# Supplementary material for: Common variants upstream of KDR encoding VEGFR2 and in TTC39B associate with endometriosis
Source: PubMed Central journal article supplement (PMC4962463; doi:10.1038/ncomms12350), 2016-07-25
Supplement: ncomms12350-s1.pdf [file ncomms12350-s1.pdf]

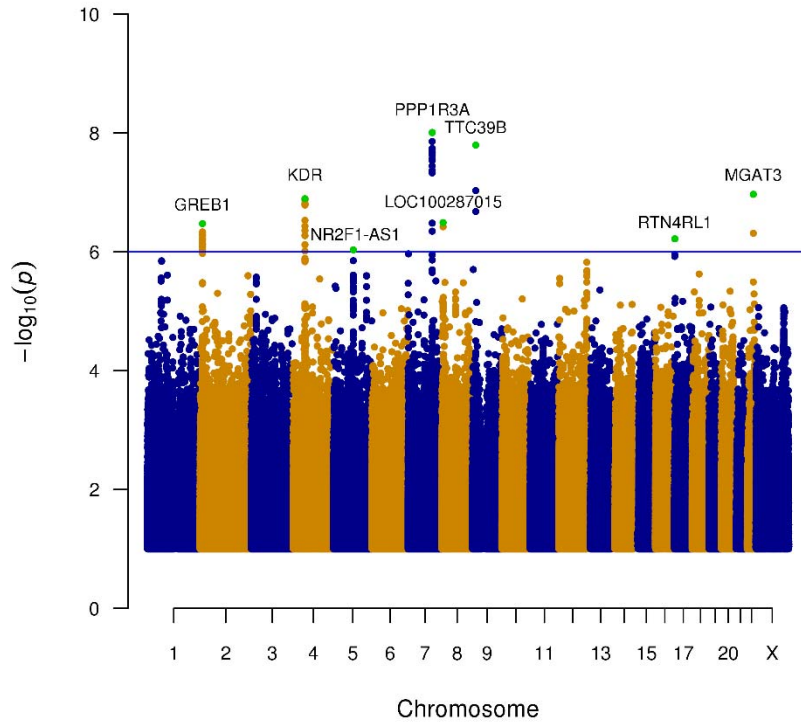

**Supplementary Figure 1. Manhattan plot showing genome wide association results for all endometriosis**

Results are shown for variants with association  $P$ -value  $< 0.1$  and imputation information  $> 0.9$ . Variants selected for follow up are highlighted in green and labels indicate the nearest gene (see Supplementary Table 2).

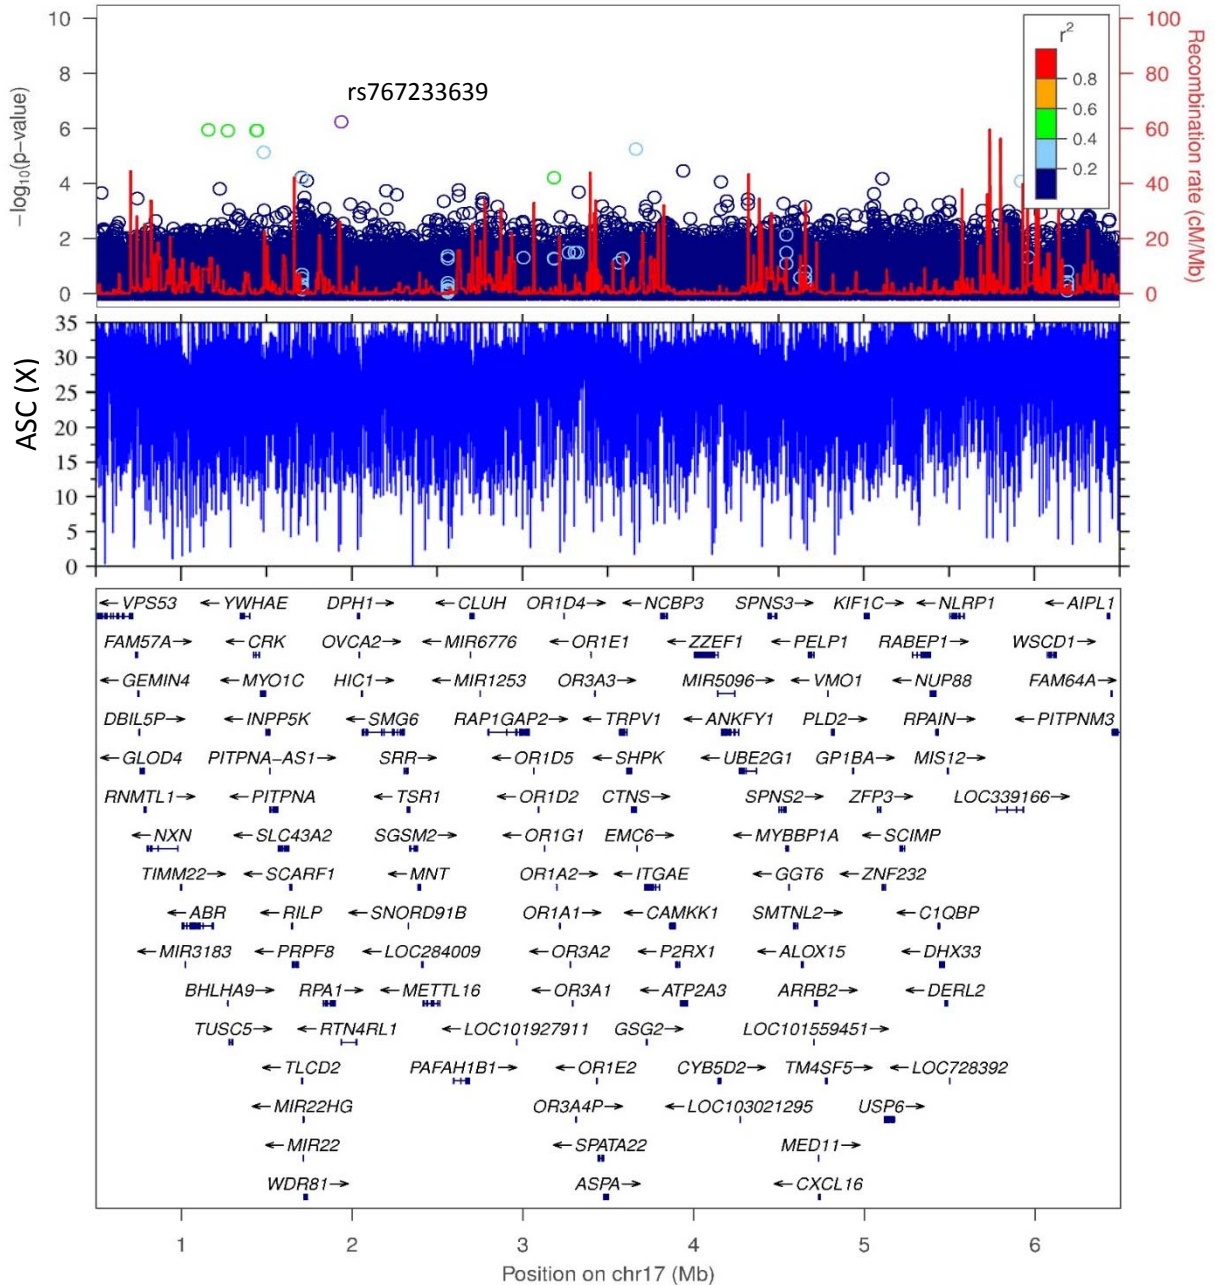

**Supplementary Figure 2 . Regional plot of chr17p showing rs767233639 and correlated variants with evidence of association with endometriosis**

Regional association plot for a 6 Mb region on chromosome 17 showing variants correlated with rs767233639 ( $R^2 > 0.2$ ) and with evidence of association with endometriosis ( $P < 0.01$ ). The top panel shows the  $-\log_{10} P$ -values (left vertical axis) for variants association with endometriosis in the Icelandic samples against their position, together with estimates of recombination rate from the International HapMap Project (right vertical axis). The second panel shows the average sequence coverage in the 8,453 WGS individuals across the region. The lowest panel shows known genes in the region, taken from the UCSC genome browser. Note that due to the size of the region not all genes are shown. All positions are in NCBI Build 38 coordinates.

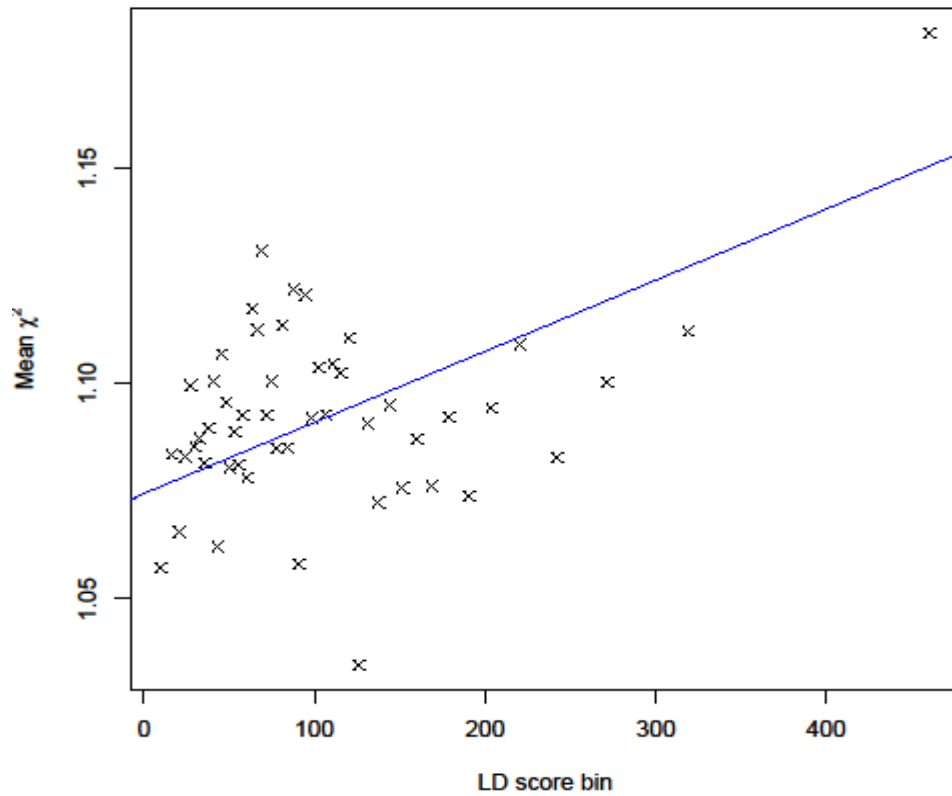

**Supplementary Figure 3. Relationship between LD score regression and genomic control inflation factor for the endometriosis dataset**

LD score regression plot for endometriosis with each point representing a LD score quantile. The x-axis coordinates represent the mean LD score of a quantile and the y-axis the mean  $\chi^2$  statistic of the quantile. The blue line is the LD score regression line.

**Supplementary Table 1. Association results for variant previously reported to associate with endometriosis in GWAS studies**

| SNP        | Chr | Pos hg38  | Risk allele | Case selection | Meta-analysis results <sup>a</sup> |                  | Icelandic data <sup>b</sup> |                      |                  | Nearest gene      |        |                  |
|------------|-----|-----------|-------------|----------------|------------------------------------|------------------|-----------------------------|----------------------|------------------|-------------------|--------|------------------|
|            |     |           |             |                | <i>P</i> -meta                     | OR (95% CI)      | RAF <sup>c</sup>            | <i>P</i> -value      | OR (95% CI)      |                   |        |                  |
| rs7521902  | 1   | 22164231  | A           | All            | 1.8×10 <sup>-15</sup>              | 1.18 (1.13-1.23) | 28.0                        | 0.034                | 1.09 (1.01-1.18) | <i>WNT4</i>       |        |                  |
|            |     |           |             | III/IV only    | 1.8×10 <sup>-10</sup>              | 1.25 (1.16-1.33) |                             |                      |                  |                   | 0.025  | 1.16 (1.02-1.32) |
|            |     |           |             | III/IV vs I/II |                                    |                  |                             |                      |                  |                   | 0.10   | 1.18 (0.97-1.44) |
| rs13394619 | 2   | 11587381  | G           | All            | 4.5×10 <sup>-8</sup>               | 1.13 (1.07-1.20) | 51.4                        | 7.4×10 <sup>-7</sup> | 1.20 (1.12-1.29) | <i>GREB1</i>      |        |                  |
|            |     |           |             | III/IV only    | 2.1×10 <sup>-3</sup>               | 1.18 (1.11-1.24) |                             |                      |                  |                   | 0.032  | 1.14 (1.01-1.29) |
|            |     |           |             | III/IV vs I/II |                                    |                  |                             |                      |                  |                   | 0.75   | 0.97 (0.80-1.17) |
| rs4141819  | 2   | 67637543  | C           | All            | 2.1×10 <sup>-4</sup>               | 1.08 (1.04-1.12) | 29.0                        | 0.050                | 1.08 (1.00-1.17) | <i>ETAA1</i>      |        |                  |
|            |     |           |             | III/IV only    | 6.9×10 <sup>-6</sup>               | 1.16 (1.09-1.24) |                             |                      |                  |                   | 0.0072 | 1.19 (1.05-1.35) |
|            |     |           |             | III/IV vs I/II |                                    |                  |                             |                      |                  |                   | 0.07   | 1.19 (0.99-1.44) |
| rs1250248  | 2   | 215422370 | A           | All            | 1.1×10 <sup>-4</sup>               | 1.11 (1.04-1.18) | 33.9                        | 0.0015               | 1.13 (1.05-1.22) | <i>FN1</i>        |        |                  |
|            |     |           |             | III/IV only    | 8.0×10 <sup>-8</sup>               | 1.26 (1.16-1.38) |                             |                      |                  |                   | 0.055  | 1.13 (1.00-1.28) |
|            |     |           |             | III/IV vs I/II |                                    |                  |                             |                      |                  |                   | 0.90   | 1.01 (0.86-1.18) |
| rs6734792  | 2   | 150768368 | C           | All            | 9.7×10 <sup>-5</sup>               | 1.10 (1.06-1.16) | 35.5                        | 0.40                 | 1.03 (0.96-1.10) | <i>RND3</i>       |        |                  |
|            |     |           |             | III/IV only    | 6.5×10 <sup>-5</sup>               | 1.10 (1.05-1.15) |                             |                      |                  |                   | 0.36   | 1.06 (0.94-1.20) |
|            |     |           |             | III/IV vs I/II |                                    |                  |                             |                      |                  |                   | 0.17   | 1.13 (0.95-1.35) |
| rs7739264  | 6   | 19785357  | T           | All            | 1.9×10 <sup>-10</sup>              | 1.11 (1.08-1.15) | 49.4                        | 0.12                 | 1.06 (0.98-1.14) | <i>ID4</i>        |        |                  |
|            |     |           |             | III/IV only    | 1.2×10 <sup>-8</sup>               | 1.20 (1.13-1.28) |                             |                      |                  |                   | 0.10   | 1.10 (0.98-1.23) |
|            |     |           |             | III/IV vs I/II |                                    |                  |                             |                      |                  |                   | 0.20   | 1.12 (0.94-1.33) |
| rs12700667 | 7   | 25862019  | A           | All            | 1.9×10 <sup>-9</sup>               | 1.13 (1.08-1.17) | 72.7                        | 0.032                | 1.10 (1.01-1.20) | <i>NFE2L3</i>     |        |                  |
|            |     |           |             | III/IV only    | 4.5×10 <sup>-8</sup>               | 1.22 (1.14-1.31) |                             |                      |                  |                   | 0.0071 | 1.20 (1.05-1.37) |
|            |     |           |             | III/IV vs I/II |                                    |                  |                             |                      |                  |                   | 0.034  | 1.23 (1.02-1.49) |
| rs7798431  | 7   | 25821192  | G           | All            | 5.4×10 <sup>-9</sup>               | 1.13 (1.09-1.18) | 76.5                        | 0.0094               | 1.12 (1.03-1.22) | <i>NFE2L3</i>     |        |                  |
|            |     |           |             | III/IV only    | 9.7×10 <sup>-8</sup>               | 1.24 (1.14-1.33) |                             |                      |                  |                   | 0.0046 | 1.23 (1.07-1.42) |
|            |     |           |             | III/IV vs I/II |                                    |                  |                             |                      |                  |                   | 0.084  | 1.20 (0.98-1.48) |
| rs1537377  | 9   | 22169701  | C           | All            | 1.0×10 <sup>-8</sup>               | 1.12 (1.08-1.17) | 42.2                        | 0.034                | 1.08 (1.01-1.16) | <i>CDKN2B-AS1</i> |        |                  |

|            |    |          |   |                |                       |                  |      |         |                  |                   |
|------------|----|----------|---|----------------|-----------------------|------------------|------|---------|------------------|-------------------|
|            |    |          |   | III/IV only    | 8.1×10 <sup>-8</sup>  | 1.18 (1.11-1.26) |      | 0.0017  | 1.21 (1.07-1.36) |                   |
|            |    |          |   | III/IV vs I/II |                       |                  |      | 0.057   | 1.19 (0.99-1.42) |                   |
| rs1333049  | 9  | 22125504 | G | All            | 0.25                  | 1.04 (0.98-1.10) | 55.3 | 0.00084 | 1.13 (1.05-1.21) | <i>CDKN2B-AS1</i> |
|            |    |          |   | III/IV only    | 0.55                  | 1.03 (0.94-1.12) |      | 0.0085  | 1.18 (1.04-1.33) |                   |
|            |    |          |   | III/IV vs I/II |                       |                  |      | 0.88    | 1.01 (0.89-1.15) |                   |
| rs10859871 | 12 | 95318100 | C | All            | 4.8×10 <sup>-15</sup> | 1.18 (1.13-1.22) | 29.9 | 0.047   | 1.08 1.00-1.17)  | <i>VEZT</i>       |
|            |    |          |   | III/IV only    | 6.8×10 <sup>-7</sup>  | 1.19 (1.11-1.27) |      | 0.0048  | 1.20 (1.06-1.36) |                   |
|            |    |          |   | III/IV vs I/II |                       |                  |      | 0.51    | 1.06 (0.89-1.26) |                   |

<sup>a</sup> data based on 11,506 endometriosis cases and 32,678 controls of European and Japanese origin for variants that have previously been reported with genome wide significance in endometriosis GWAS studies (from Rahmioglu, N. et al. *Hum. Reprod. Update* **20**, 702–716 (2014)). <sup>b</sup> association results obtained in the Icelandic population sample from the current analysis for all endometriosis cases (N = 1,840 cases and 129,016 controls), endometriosis cases with stage III/IV disease (N = 688 cases and 123,526 controls) and endometriosis cases with stage III/IV disease tested against cases with stage I/II disease (N = 688 cases and 620 controls). <sup>c</sup> RAF = risk allele frequency in the Icelandic data.

**Supplementary Table 2. Follow up of variants with  $P < 1 \times 10^{-6}$  in GWAS of all endometriosis cases.**

| Marker      | Chr | Position (hg38) | A <sub>min</sub> | A <sub>maj</sub> | Discovery <sup>a</sup> |         |                 | Proxy tested ( $r^2$ ) | Follow up <sup>b</sup> |      | Nearest gene        | Coding effect |
|-------------|-----|-----------------|------------------|------------------|------------------------|---------|-----------------|------------------------|------------------------|------|---------------------|---------------|
|             |     |                 |                  |                  | MAF                    | P-value | OR <sup>c</sup> |                        | P-value                | OR   |                     |               |
| rs118137751 | 7   | 113897738       | A                | G                | 4.18                   | 9.8E-09 | 1.59            |                        | 0.23                   | 0.77 | <i>PPP1R3A</i>      | intron        |
| rs519664    | 9   | 15246654        | T                | C                | 20.42                  | 1.6E-08 | 1.28            |                        | 0.0090                 | 1.30 | <i>TTC39B</i>       | intron        |
| rs4497965   | 22  | 39448781        | T                | C                | 12.70                  | 1.1E-07 | 1.32            |                        | 0.95                   | 1.01 | <i>MGAT3</i>        | intergenic    |
| rs17773813  | 4   | 55142802        | A                | G                | 31.76                  | 1.3E-07 | 0.81            |                        | 1.3E-05                | 0.67 | <i>KDR</i>          | intergenic    |
| rs7826510   | 8   | 5935362         | G                | T                | 15.44                  | 3.2E-07 | 1.28            | rs7822296 (1)          | 0.98                   | 0.99 | <i>LOC100287015</i> | intergenic    |
| rs767233639 | 17  | 1934814         | G                | GC               | 0.05                   | 6.0E-07 | 9.19            |                        |                        |      | <i>RTN4RL1</i>      | 3' UTR        |
| rs1471289   | 5   | 93349720        | C                | G                | 25.26                  | 9.3E-07 | 0.80            |                        | 0.59                   | 1.05 | <i>NR2F1-AS1</i>    | intergenic    |

<sup>a</sup> association results for variants at all novel loci with  $P < 1 \times 10^{-6}$  in the Icelandic analysis for all endometriosis (N = 1,840 cases and 129,016 controls).

<sup>b</sup> association results in the Danish follow up samples (N = 514 cases and 749 controls).

<sup>c</sup> OR: Odds ratio reported on the minor allele; <sup>d</sup> NP: Not polymorphic

**Supplementary Table 3. Association with disease severity for variants in linkage disequilibrium with rs767233639**

| Name            | Pos chr17 | A <sub>min</sub> | A <sub>maj</sub> | MAF % | Endometriosis           |         | Stage III/IV            |         | Stage I/II              |         | Stage III/IV vs I/II    |         |
|-----------------|-----------|------------------|------------------|-------|-------------------------|---------|-------------------------|---------|-------------------------|---------|-------------------------|---------|
|                 |           |                  |                  |       | Effect A <sub>min</sub> | P-value | Effect A <sub>min</sub> | P-value | Effect A <sub>min</sub> | P-value | Effect A <sub>min</sub> | P-value |
| chr17:1155537:0 | 1155537   | A                | G                | 0.021 | 15.75                   | 1.1E-06 | 29.04                   | 1.0E-06 | 4.84                    | 0.21    | 2.63                    | 0.23    |
| rs779385919     | 1270250   | T                | C                | 0.021 | 15.6                    | 1.2E-06 | 28.79                   | 1.1E-06 | 4.76                    | 0.22    | 2.63                    | 0.23    |
| chr17:1437418:0 | 1437418   | GA               | G                | 0.021 | 15.67                   | 1.1E-06 | 28.84                   | 1.1E-06 | 4.82                    | 0.22    | 2.63                    | 0.23    |
| rs186322894     | 1440971   | A                | C                | 0.021 | 15.67                   | 1.1E-06 | 28.84                   | 1.1E-06 | 4.82                    | 0.22    | 2.63                    | 0.23    |
| rs191466924     | 1479805   | A                | G                | 0.025 | 11.52                   | 7.3E-06 | 22.02                   | 3.8E-06 | 3.80                    | 0.28    | 2.63                    | 0.23    |
| rs767233639     | 1934814   | G                | GC               | 0.05  | 9.19                    | 6.0E-07 | 15.45                   | 7.9E-07 | 5.31                    | 0.064   | 2.12                    | 0.27    |
| rs61169988      | 3182558   | A                | AAAG             | 0.019 | 13.15                   | 6.1E-05 | 21.46                   | 0.00021 | 5.63                    | 0.18    | 1.81                    | 0.52    |
| rs778764728     | 3662028   | T                | C                | 0.02  | 15.33                   | 6.1E-06 | 25.94                   | 1.4E-05 | 5.33                    | 0.19    | 2.18                    | 0.36    |
| rs771535120     | 5921572   | G                | A                | 0.032 | 9.51                    | 8.0E-05 | 17.60                   | 6.8E-05 | 3.58                    | 0.30    | 2.18                    | 0.36    |

Variants correlated with rs767233639 ( $R^2 > 0.2$ ) in a region spanning the p-terminus of chr17 up to 10 Mb upstream of rs767233639 that associated with endometriosis with  $P < 0.01$  were tested for association with endometriosis severity.

**Supplementary Table 4. Conditional analysis of variants in linkage disequilibrium with rs767233639**

| Name            | Pos<br>chr17 | A <sub>min</sub> | A <sub>maj</sub> | MAF   |      | Nearest<br>gene  | Coding<br>effect | R <sup>2</sup> | Effect<br>A <sub>min</sub> | Adjusting for<br>rs767233639  |                             | Adjusting<br>rs767233639 for<br>covariates |                             |
|-----------------|--------------|------------------|------------------|-------|------|------------------|------------------|----------------|----------------------------|-------------------------------|-----------------------------|--------------------------------------------|-----------------------------|
|                 |              |                  |                  | %     | Info |                  |                  |                |                            | Unadjusted<br><i>P</i> -value | Adjusted<br><i>P</i> -value | Unadjusted<br><i>P</i> -value              | Adjusted<br><i>P</i> -value |
| chr17:1155537:0 | 1155537      | A                | G                | 0.021 | 0.99 | <i>ABR</i>       | intron           | 0.42           | 15.75                      | 1.1E-06                       | 0.18                        | 6.0E-07                                    | 0.037                       |
| rs779385919     | 1270250      | T                | C                | 0.021 | 0.99 | <i>BHLHA9</i>    | upstream         | 0.42           | 15.60                      | 1.2E-06                       | 0.19                        | 6.0E-07                                    | 0.036                       |
| chr17:1437418:0 | 1437418      | GA               | G                | 0.021 | 0.99 | <i>CRK</i>       | intron           | 0.42           | 15.67                      | 1.1E-06                       | 0.19                        | 6.0E-07                                    | 0.036                       |
| rs186322894     | 1440971      | A                | C                | 0.021 | 0.99 | <i>CRK</i>       | intron           | 0.42           | 15.67                      | 1.1E-06                       | 0.19                        | 6.0E-07                                    | 0.036                       |
| rs191466924     | 1479805      | A                | G                | 0.025 | 0.99 | <i>MYO1C</i>     | intron           | 0.30           | 11.52                      | 7.3E-06                       | 0.26                        | 6.0E-07                                    | 0.014                       |
| rs767233639     | 1934814      | G                | GC               | 0.05  | 0.96 | <i>RTN4RL1</i>   | 3'UTR            | 1.0            | 9.19                       | 6.0E-07                       | 1                           | 6.0E-07                                    | 1                           |
| rs61169988      | 3182558      | A                | AAAG             | 0.019 | 1.00 |                  | intergenic       | 0.42           | 13.15                      | 6.1E-05                       | 0.66                        | 6.0E-07                                    | 0.0017                      |
| rs778764728     | 3662028      | T                | C                | 0.02  | 1.00 | <i>CTNS</i>      | 3'UTR            | 0.35           | 15.33                      | 6.1E-06                       | 0.27                        | 6.0E-07                                    | 0.0084                      |
| rs771535120     | 5921572      | G                | A                | 0.032 | 0.98 | <i>LOC339166</i> | intron           | 0.21           | 9.51                       | 8.0E-05                       | 0.33                        | 6.0E-07                                    | 0.0014                      |

Variants correlated with rs767233639 ( $R^2 > 0.2$ ) in a region spanning the p-terminus of chr17 up to 10 Mb upstream of rs767233639 that associated with endometriosis with  $P < 0.01$  were tested for association before and after adjusting for the effect of rs767233639. Association of rs767233639 was also tested by adjusting for each of the 8 correlated variants.
